# Supplementary material for: In Vitro Autonomous Construction of the Flagellar Axial Structure in Inverted Membrane Vesicles
Source: MDPI journal article supplement (doi:10.3390/biom10010126), 2020-01-11
Supplement: s1 [file s1]

**Table S1.** Primer list for this study.

| primer          | sequence                                |
|-----------------|-----------------------------------------|
| pTrc99a-Nde1(+) | acacaggaacagcatatggaattcgagct           |
| pTrc99a-Nde1(-) | agctcgaattccatagctgttctctgtgt           |
| Nde1-fliS(+)    | gggaattccatagtacaccgagcggtatcaaagcttat  |
| BamH1-fliS(-)   | cgcggatccttaacgagactcctggaaagatgcttcgg  |
| Nde1-fliC(+)    | gggaattccatatggcacaagtcatatacaaacagcctg |
| BamH1-fliC(-)   | cgcggatccttaacgcagtaaagagaggacglttgagg  |
| Nde1-fliT(+)    | gggaattccatagacctcaaccgtggagtattcaaccgt |
| BamH1-fliT(-)   | cgcggatccttatgagggcgccaggcgcatctggcagag |
| Nde1-fliD(+)    | gggaattccatatggctcaattcatcattagggtggga  |
| BamH1-fliD(-)   | cgcggatcctcaggactgttcatactgtaaatgctg    |
| Nde1-flgL(+)    | gggaattccatagcgtatcagtaccagatgatgacgaa  |
| BamH1-flgL(-)   | cgcggatccttaccggttcaactggaaaagcgacattcc |

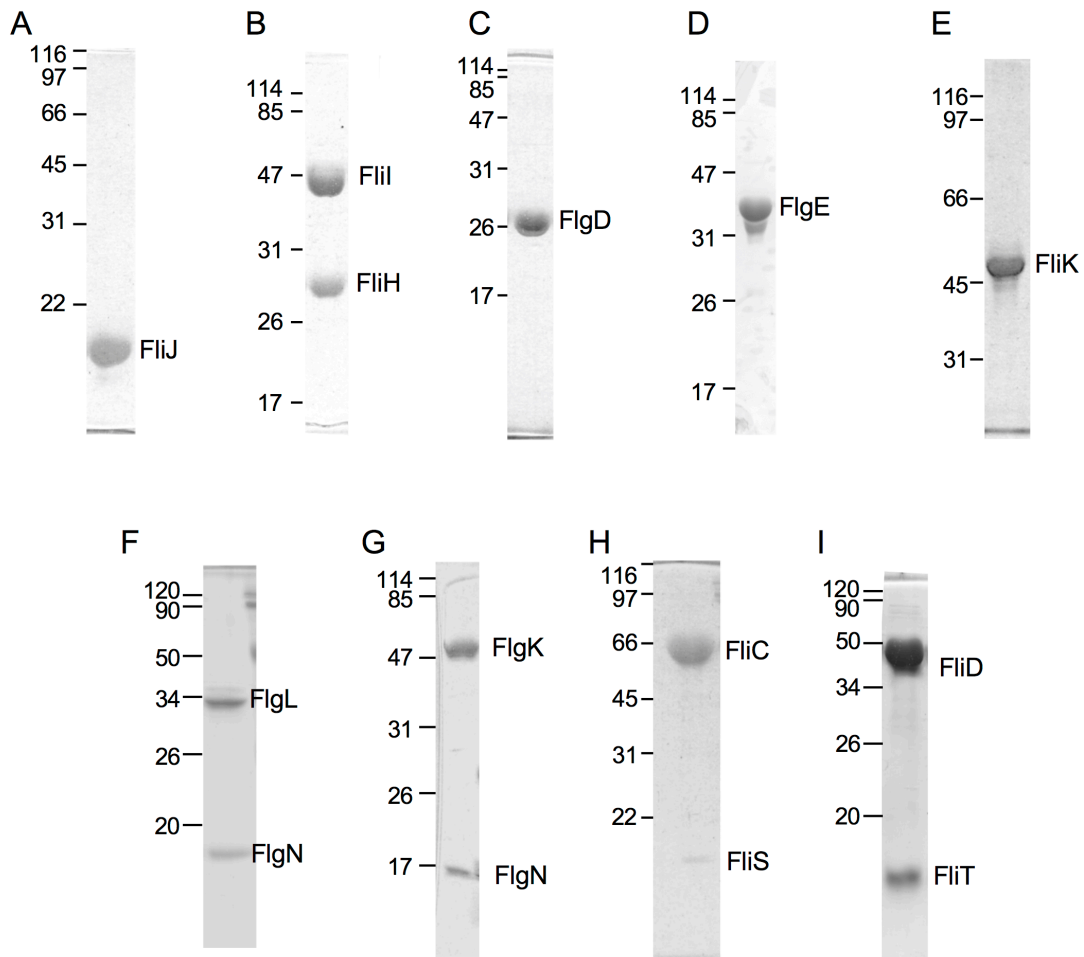

**Figure S1.** SDS-PAGE analysis of purified proteins used in the in this study. (A) FliJ, (B) the FliH/FliI complex, (C) FlgD, (D) FlgE, (E) FliK, (F) the FlgL/FlgN complex, (G) the FlgK/FlgN complex, (H) the FliC/FliS complex and (I) the FliD/FliT complex.

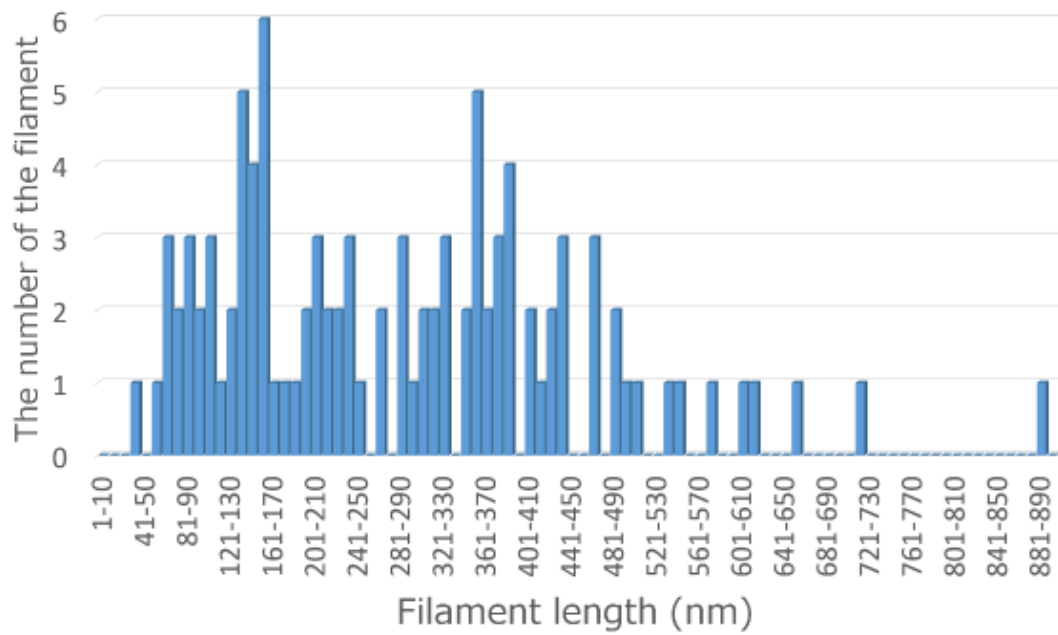

**Figure S2.** Length distribution of the filament formed on the hook in the IMVs.

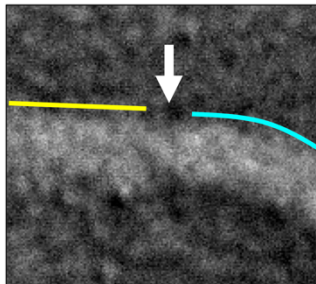

**Figure S3.** Magnified electron microscopic image of the hook-filament junction region of the hook-filament complex constructed in the IMV. The filament and the hook are indicated by yellow and blue lines, respectively, the hook filament junction is indicated by white arrow.
